# Supplementary material for: Portuguese Primary Healthcare and Prevention Quality Indicators for Diabetes Mellitus – A Data Envelopment Analysis
Source: PubMed Central journal article supplement (PMC9808229; doi:10.34172/ijhpm.2021.76), 2021-07-26
Supplement: ijhpm-11-1725-s001.pdf [file ijhpm-11-1725-s001.pdf]

**Article title:** Portuguese Primary Health Care and Prevention Quality Indicators for Diabetes Mellitus – A Data Envelopment Analysis

**Journal name:** International Journal of Health Policy and Management (IJHPM)

**Authors' information:** Andre Ramalho<sup>1,2\*</sup>, Julio Souza<sup>1,2</sup>, Pedro Castro<sup>3,2</sup>, Mariana Lobo<sup>1,2</sup>, Paulo Santos<sup>1,2</sup>, Alberto Freitas<sup>1,2</sup>

<sup>1</sup>MEDCIDS - Department of Community Medicine, Information and Health Decision Sciences, Faculty of Medicine, University of Porto, Porto, Portugal.

<sup>2</sup>CINTESIS - Centre for Health Technology and Services Research, Porto, Portugal.

<sup>3</sup>USF Camélias, ACES Gaia (Grande Porto VII - ARS Norte), Vila Nova de Gaia, Portugal.

(\*Corresponding authors: [andrelcramalho@gmail.com](mailto:andrelcramalho@gmail.com))

## Supplementary file 1

**Table S1.** Estimation of the efficiency using Vector Return to Scale (VRS) DEA model with output orientation, according to the different models (supplement to Table 2)

| ACES             | PQI 01 |      | PQI 03 |      | PQI 14 |      | PQI 16 |      | PQI 93 |      |
|------------------|--------|------|--------|------|--------|------|--------|------|--------|------|
|                  | 2016   | 2017 | 2016   | 2017 | 2016   | 2017 | 2016   | 2017 | 2016   | 2017 |
| Alentejo Central | 3.58   | 4.37 | 3.59   | 7.11 | 6.66   | 3.83 | 2.23   | 3.81 | 2.57   | 2.59 |
| Alentejo Litoral | 1.00   | 1.00 | 1.00   | 1.00 | 1.00   | 1.00 | 1.00   | 1.00 | 1.00   | 1.00 |
| Baixo Alentejo   | 2.09   | 4.90 | 2.39   | 5.17 | 3.96   | 1.52 | 3.21   | 3.18 | 2.75   | 2.09 |
| São Mamede       | 4.54   | 2.44 | 1.37   | 3.88 | 9.84   | 1.69 | 2.18   | 1.79 | 2.40   | 1.42 |
| Barlavento       | 3.42   | 4.67 | 2.45   | 4.58 | 1.01   | 3.88 | 3.51   | 1.94 | 1.98   | 2.07 |
| Algarve Central  | 2.03   | 3.57 | 1.78   | 2.16 | 7.08   | 4.78 | 4.09   | 3.74 | 1.72   | 1.46 |

|                           |      |      |      |      |       |       |      |      |      |      |
|---------------------------|------|------|------|------|-------|-------|------|------|------|------|
| Sotavento                 | 1.00 | 1.00 | 1.00 | 1.00 | 1.00  | 1.00  | 1.00 | 1.00 | 1.00 | 1.00 |
| Baixo Mondego             | 1.79 | 1.61 | 1.78 | 2.30 | 30.65 | 7.54  | 2.71 | 2.96 | 2.17 | 1.22 |
| Baixo Vouga               | 2.10 | 3.49 | 1.76 | 2.30 | 9.93  | 7.82  | 3.31 | 2.53 | 1.71 | 1.55 |
| Beira Interior Sul        | 1.00 | 1.00 | 1.00 | 1.37 | 1.00  | 1.58  | 1.00 | 1.00 | 1.00 | 1.00 |
| Cova da Beira             | 1.00 | 2.21 | 1.00 | 2.58 | 1.00  | 10.84 | 1.00 | 2.67 | 1.00 | 2.70 |
| Dão Lafões                | 2.12 | 3.33 | 1.67 | 3.09 | 12.05 | 9.84  | 2.10 | 2.16 | 1.53 | 1.64 |
| Guarda                    | 1.00 | 1.00 | 1.00 | 3.07 | 4.49  | 6.95  | 1.76 | 1.83 | 1.01 | 1.46 |
| Pinhal Interior Norte     | 1.00 | 1.59 | 1.68 | 1.95 | 19.99 | 3.06  | 1.30 | 1.00 | 2.10 | 1.00 |
| Pinhal Litoral            | 2.60 | 3.41 | 2.93 | 2.71 | 43.50 | 15.58 | 2.06 | 2.59 | 2.84 | 2.25 |
| Almada/ Seixal            | 3.03 | 4.59 | 2.42 | 3.57 | 5.24  | 6.47  | 3.66 | 4.60 | 2.04 | 1.88 |
| Amadora                   | 7.09 | 5.21 | 3.05 | 4.14 | 7.10  | 5.68  | 3.24 | 6.64 | 3.01 | 2.73 |
| Arco Ribeirinho           | 3.94 | 2.28 | 3.39 | 4.57 | 11.77 | 15.14 | 2.56 | 6.92 | 2.61 | 2.81 |
| Arrábida                  | 3.59 | 4.33 | 3.02 | 8.11 | 5.94  | 5.87  | 3.81 | 7.79 | 2.25 | 2.83 |
| Cascais                   | 3.48 | 3.47 | 2.51 | 5.64 | 8.85  | 5.29  | 1.53 | 5.28 | 1.97 | 2.35 |
| Estuário do Tejo          | 4.26 | 5.72 | 2.88 | 4.91 | 22.20 | 21.31 | 3.23 | 8.69 | 2.73 | 3.73 |
| Lezíria                   | 5.00 | 7.02 | 2.39 | 2.37 | 23.07 | 14.49 | 3.22 | 4.80 | 2.77 | 2.89 |
| Lisboa Central            | 2.54 | 2.80 | 2.82 | 4.57 | 23.38 | 11.45 | 1.50 | 2.33 | 2.48 | 2.38 |
| Lisboa Norte              | 3.44 | 3.46 | 2.14 | 3.53 | 18.79 | 12.84 | 2.10 | 3.24 | 2.21 | 2.31 |
| Lisboa Ocidental e Oeiras | 3.78 | 3.98 | 2.78 | 3.39 | 14.72 | 6.70  | 2.51 | 3.82 | 2.34 | 1.98 |
| Loures/Odivelas           | 3.65 | 2.66 | 2.06 | 2.33 | 13.21 | 6.65  | 3.03 | 2.31 | 2.12 | 1.41 |
| Médio Tejo                | 2.84 | 3.57 | 1.16 | 3.20 | 16.50 | 7.52  | 1.66 | 3.39 | 1.59 | 1.90 |
| Oeste Norte               | 4.35 | 4.53 | 2.55 | 4.55 | 21.39 | 10.93 | 3.12 | 5.19 | 2.54 | 2.87 |
| Oeste Sul                 | 3.03 | 1.69 | 2.91 | 4.80 | 6.18  | 6.16  | 3.81 | 3.30 | 2.22 | 1.89 |
| Sintra                    | 5.28 | 5.48 | 3.38 | 3.87 | 14.06 | 7.24  | 4.76 | 7.37 | 3.13 | 2.41 |
| Alto Ave                  | 4.25 | 5.63 | 1.84 | 2.32 | 6.94  | 12.03 | 2.45 | 4.62 | 1.90 | 2.13 |
| Alto Minho                | 1.87 | 2.98 | 2.08 | 3.96 | 5.01  | 4.92  | 1.70 | 4.38 | 1.48 | 1.77 |
| Alto Tâmega e Barroso     | 7.94 | 3.87 | 2.75 | 3.86 | 7.40  | 9.38  | 1.91 | 1.75 | 3.07 | 2.22 |
| Ave/Famalicão             | 1.00 | 1.77 | 1.00 | 1.79 | 1.00  | 1.60  | 1.00 | 1.50 | 1.00 | 1.18 |
| Aveiro Norte              | 1.78 | 1.65 | 1.00 | 3.36 | 3.23  | 2.46  | 1.99 | 1.54 | 1.16 | 1.27 |

|                               |      |      |      |      |       |       |      |      |      |      |
|-------------------------------|------|------|------|------|-------|-------|------|------|------|------|
| Baixo Tâmega                  | 2.05 | 1.61 | 1.41 | 4.19 | 1.67  | 1.57  | 1.10 | 1.38 | 1.35 | 1.40 |
| Barcelos/Esposende            | 2.62 | 1.62 | 1.63 | 1.79 | 8.72  | 4.74  | 3.07 | 3.48 | 1.84 | 1.31 |
| Braga                         | 2.83 | 2.90 | 1.36 | 1.36 | 7.22  | 1.00  | 1.83 | 3.24 | 1.36 | 1.05 |
| Douro Sul                     | 2.45 | 1.71 | 1.49 | 2.04 | 8.37  | 9.08  | 1.57 | 1.00 | 2.02 | 1.84 |
| Espinho Gaia                  | 4.25 | 5.09 | 1.07 | 2.03 | 11.52 | 3.05  | 1.00 | 2.07 | 1.51 | 1.51 |
| Feira e Arouca                | 2.62 | 2.31 | 1.36 | 2.56 | 5.92  | 3.67  | 1.74 | 2.85 | 1.48 | 1.37 |
| Gaia                          | 2.77 | 4.05 | 1.12 | 2.56 | 8.77  | 3.97  | 1.89 | 3.95 | 1.40 | 1.72 |
| Gerês/Cabreira                | 3.75 | 2.68 | 2.11 | 1.00 | 6.77  | 1.56  | 3.41 | 1.31 | 2.31 | 1.00 |
| Gondomar                      | 3.62 | 4.26 | 3.76 | 6.50 | 11.54 | 7.05  | 2.70 | 5.76 | 2.78 | 2.76 |
| Maia/Valongo                  | 2.40 | 3.26 | 3.47 | 7.78 | 23.54 | 13.55 | 2.99 | 4.83 | 2.71 | 3.18 |
| Marão e Douro Norte           | 2.53 | 1.18 | 1.89 | 3.79 | 13.11 | 8.10  | 1.15 | 1.69 | 1.91 | 1.71 |
| Matosinhos                    | 2.76 | 3.11 | 2.58 | 5.61 | 6.70  | 6.74  | 3.35 | 5.80 | 2.05 | 2.39 |
| Nordeste                      | 2.69 | 3.70 | 1.71 | 2.16 | 10.43 | 3.92  | 1.57 | 3.26 | 1.54 | 1.45 |
| Porto Ocidental               | 1.66 | 3.47 | 3.26 | 5.18 | 15.93 | 6.36  | 2.63 | 5.57 | 2.41 | 2.32 |
| Porto Oriental                | 1.53 | 2.45 | 3.05 | 4.36 | 12.40 | 7.93  | 3.09 | 1.71 | 2.33 | 2.24 |
| Vila do Conde/Póvoa de Varzim | 2.69 | 2.02 | 2.83 | 4.56 | 16.14 | 9.80  | 2.47 | 2.98 | 2.33 | 2.03 |
| Santo Tirso/Trofa             | 1.37 | 1.00 | 1.23 | 1.00 | 2.66  | 1.00  | 2.09 | 1.00 | 1.23 | 1.00 |
| Vale do Sousa Norte           | 2.59 | 3.82 | 2.51 | 4.75 | 1.00  | 5.88  | 2.03 | 2.14 | 1.76 | 2.23 |
| Vale do Sousa Sul             | 3.61 | 2.29 | 1.62 | 5.45 | 4.08  | 4.93  | 1.78 | 1.11 | 1.57 | 1.83 |

**Table S2.** Potential of improvement Vector Return to Scale (VRS) DEA model. Target: PQI 93 rates (supplement to Table 5)

| ACES             | Actual PQI 93 | VRS DEA | Actual PQI 93 | VRS DEA |
|------------------|---------------|---------|---------------|---------|
|                  | 2016          | 2016    | 2017          | 2017    |
| Alentejo Central | 99.52         | 38.76   | 83.64         | 32.32   |
| Alentejo Litoral | 75.42         | 75.42   | 87.35         | 87.35   |
| Baixo Alentejo   | 198.52        | 72.14   | 89.95         | 43.12   |
| São Mamede       | 100.80        | 42.00   | 48.20         | 33.86   |
| Barlavento       | 76.89         | 38.76   | 69.39         | 33.60   |

|                           |        |        |        |       |
|---------------------------|--------|--------|--------|-------|
| Algarve Central           | 66.57  | 38.76  | 47.23  | 32.32 |
| Sotavento (Efficient)     | 38.76  | 38.76  | 41.82  | 41.82 |
| Baixo Mondego             | 84.09  | 38.76  | 39.37  | 32.32 |
| Baixo Vouga               | 66.18  | 38.76  | 50.06  | 32.32 |
| Beira Interior Sul        | 63.52  | 63.52  | 35.48  | 35.48 |
| Cova da Beira             | 123.06 | 123.06 | 100.27 | 37.12 |
| Dão Lafões                | 59.11  | 38.76  | 52.97  | 32.32 |
| Guarda                    | 63.70  | 63.09  | 63.11  | 43.12 |
| Pinhal Interior Norte     | 81.23  | 38.76  | 32.32  | 32.32 |
| Pinhal Litoral            | 109.99 | 38.76  | 72.85  | 32.32 |
| Almada/ Seixal            | 79.04  | 38.76  | 60.79  | 32.32 |
| Amadora                   | 116.68 | 38.76  | 91.03  | 33.38 |
| Arco Ribeirinho           | 101.13 | 38.76  | 90.66  | 32.32 |
| Arrábida                  | 87.36  | 38.76  | 91.60  | 32.32 |
| Cascais                   | 76.31  | 38.76  | 75.86  | 32.32 |
| Estuário do Tejo          | 106.01 | 38.76  | 120.58 | 32.32 |
| Lezíria                   | 107.36 | 38.76  | 93.35  | 32.32 |
| Lisboa Central            | 96.10  | 38.76  | 76.82  | 32.32 |
| Lisboa Norte              | 85.64  | 38.76  | 74.81  | 32.32 |
| Lisboa Ocidental e Oeiras | 90.57  | 38.76  | 63.86  | 32.32 |
| Loures/Odivelas           | 82.03  | 38.76  | 45.63  | 32.32 |
| Médio Tejo                | 61.48  | 38.76  | 61.31  | 32.32 |
| Oeste Norte               | 98.26  | 38.76  | 92.67  | 32.32 |
| Oeste Sul                 | 86.03  | 38.76  | 61.12  | 32.32 |
| Sintra                    | 121.26 | 38.76  | 77.99  | 32.32 |
| Alto Ave                  | 73.75  | 38.76  | 68.68  | 32.32 |
| Alto Minho                | 57.19  | 38.76  | 57.22  | 32.32 |
| Alto Tâmega e Barroso     | 118.88 | 38.76  | 76.16  | 34.31 |
| Ave/Famalicão             | 72.14  | 72.14  | 68.66  | 58.23 |

|                               |        |       |        |       |
|-------------------------------|--------|-------|--------|-------|
| Aveiro Norte                  | 45.10  | 38.76 | 44.04  | 34.58 |
| Baixo Tâmega                  | 52.48  | 38.76 | 45.86  | 32.82 |
| Barcelos/Esposende            | 71.14  | 38.76 | 43.47  | 33.07 |
| Braga                         | 52.85  | 38.76 | 33.84  | 32.32 |
| Douro Sul                     | 78.25  | 38.76 | 67.36  | 36.67 |
| Espinho Gaia                  | 58.55  | 38.76 | 48.89  | 32.32 |
| Feira e Arouca                | 57.41  | 38.76 | 44.62  | 32.60 |
| Gaia                          | 54.33  | 38.76 | 56.78  | 32.99 |
| Gerês/Cabreira                | 89.59  | 38.76 | 34.41  | 34.41 |
| Gondomar                      | 107.89 | 38.76 | 89.22  | 32.32 |
| Maia/Valongo                  | 105.10 | 38.76 | 102.85 | 32.32 |
| Marão e Douro Norte           | 74.23  | 38.76 | 57.49  | 33.66 |
| Matosinhos                    | 79.60  | 38.76 | 77.38  | 32.32 |
| Nordeste                      | 59.80  | 38.76 | 46.94  | 32.32 |
| Porto Ocidental               | 93.29  | 38.76 | 75.04  | 32.32 |
| Porto Oriental                | 90.31  | 38.76 | 80.08  | 35.68 |
| Vila do Conde/Póvoa de Varzim | 90.38  | 38.76 | 67.10  | 32.99 |
| Santo Tirso/Trofa             | 56.43  | 45.83 | 67.73  | 67.73 |
| Vale do Sousa Norte           | 68.21  | 38.76 | 72.06  | 32.32 |
| Vale do Sousa Sul             | 60.99  | 38.76 | 59.25  | 32.32 |



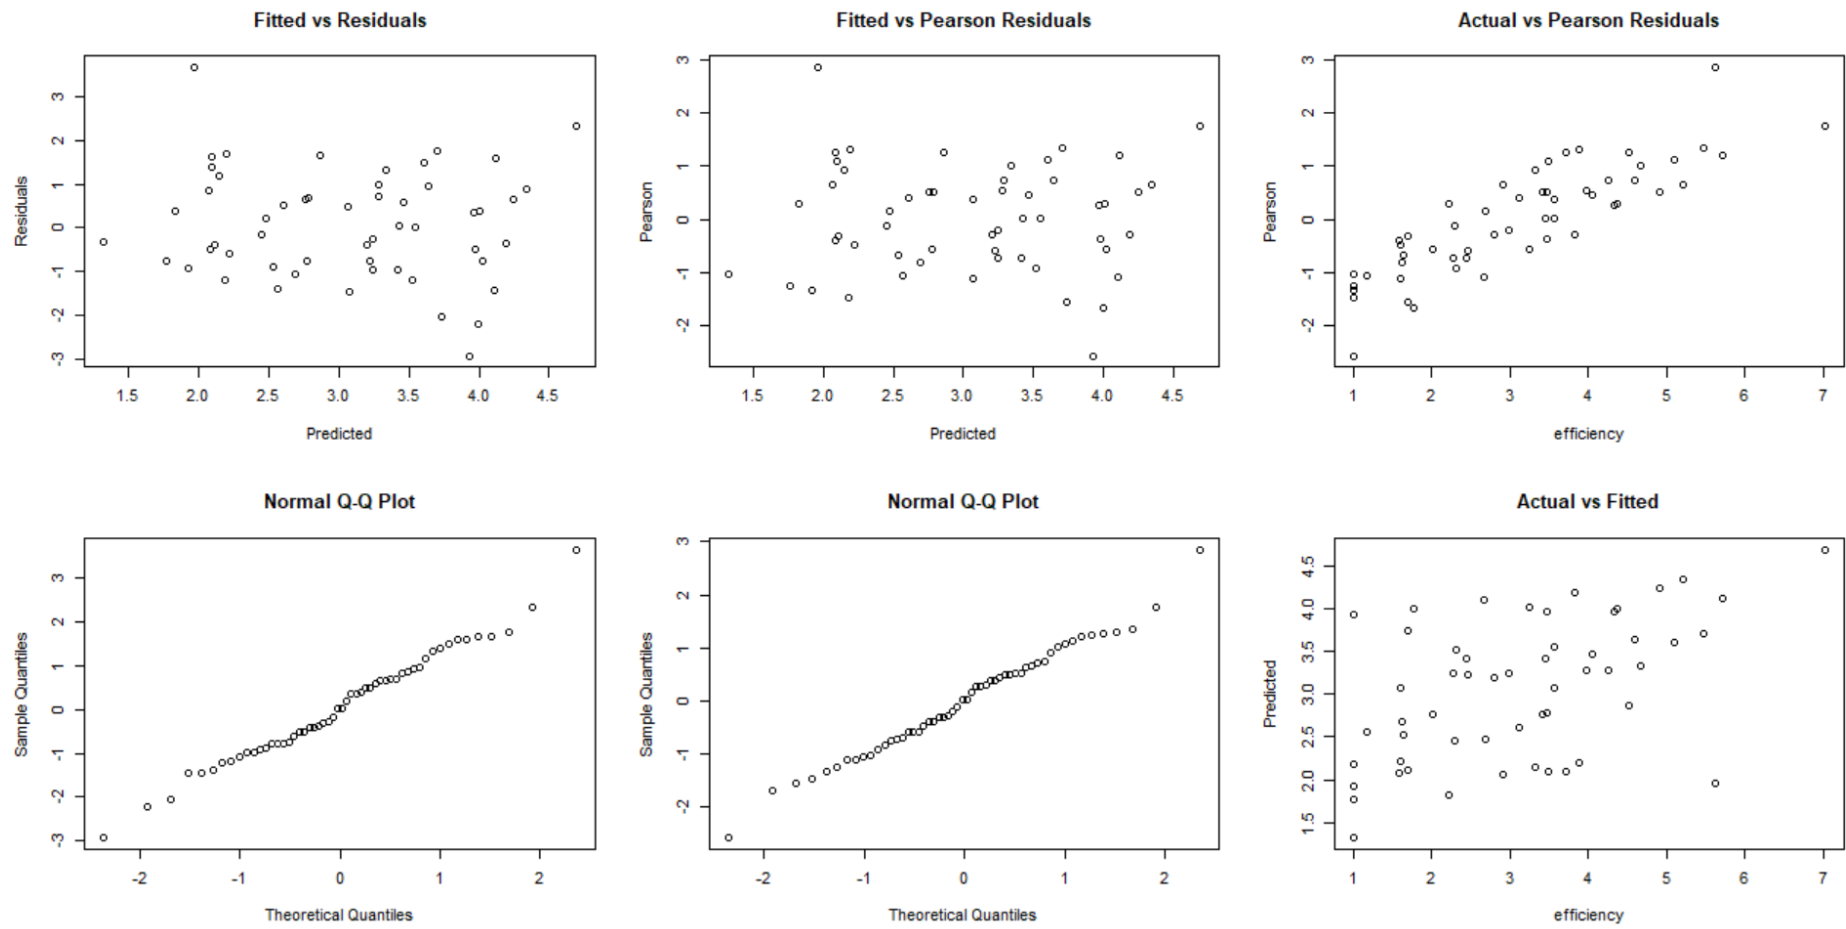

**Figure S1.** Basic residual plots for checking the Tobit Regression model fit - PQI 01.

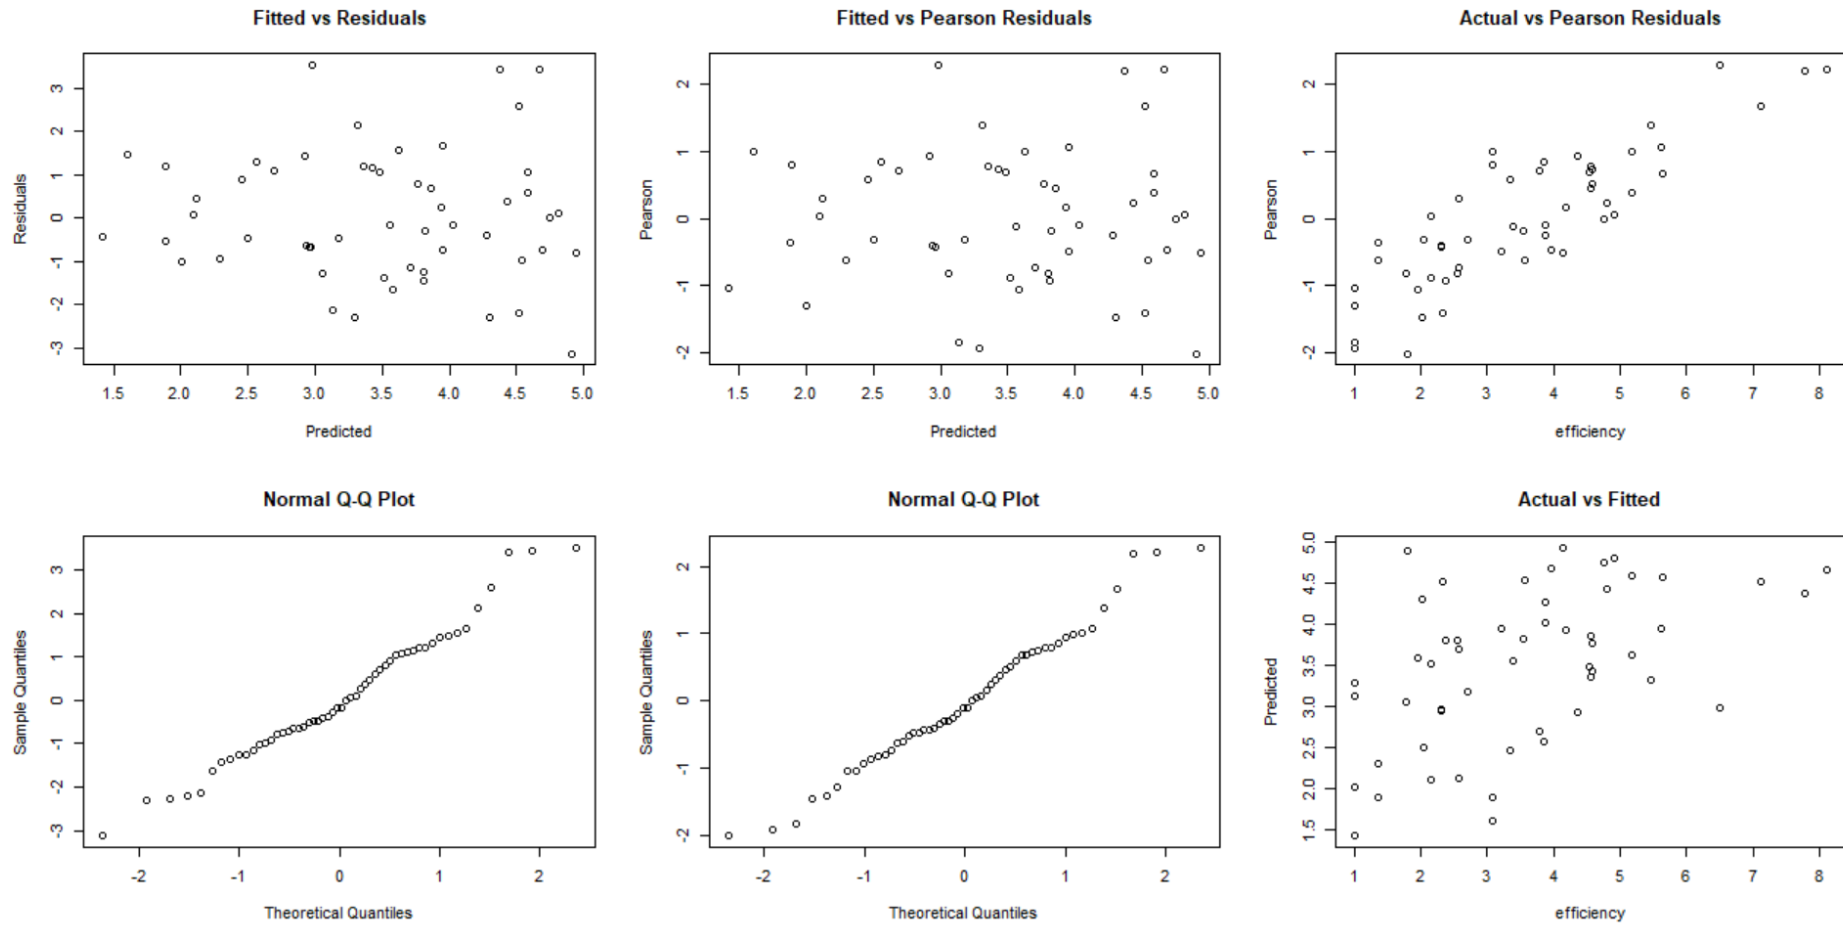

**Figure S2.** Basic residual plots for checking the Tobit Regression model fit – PQI 03.



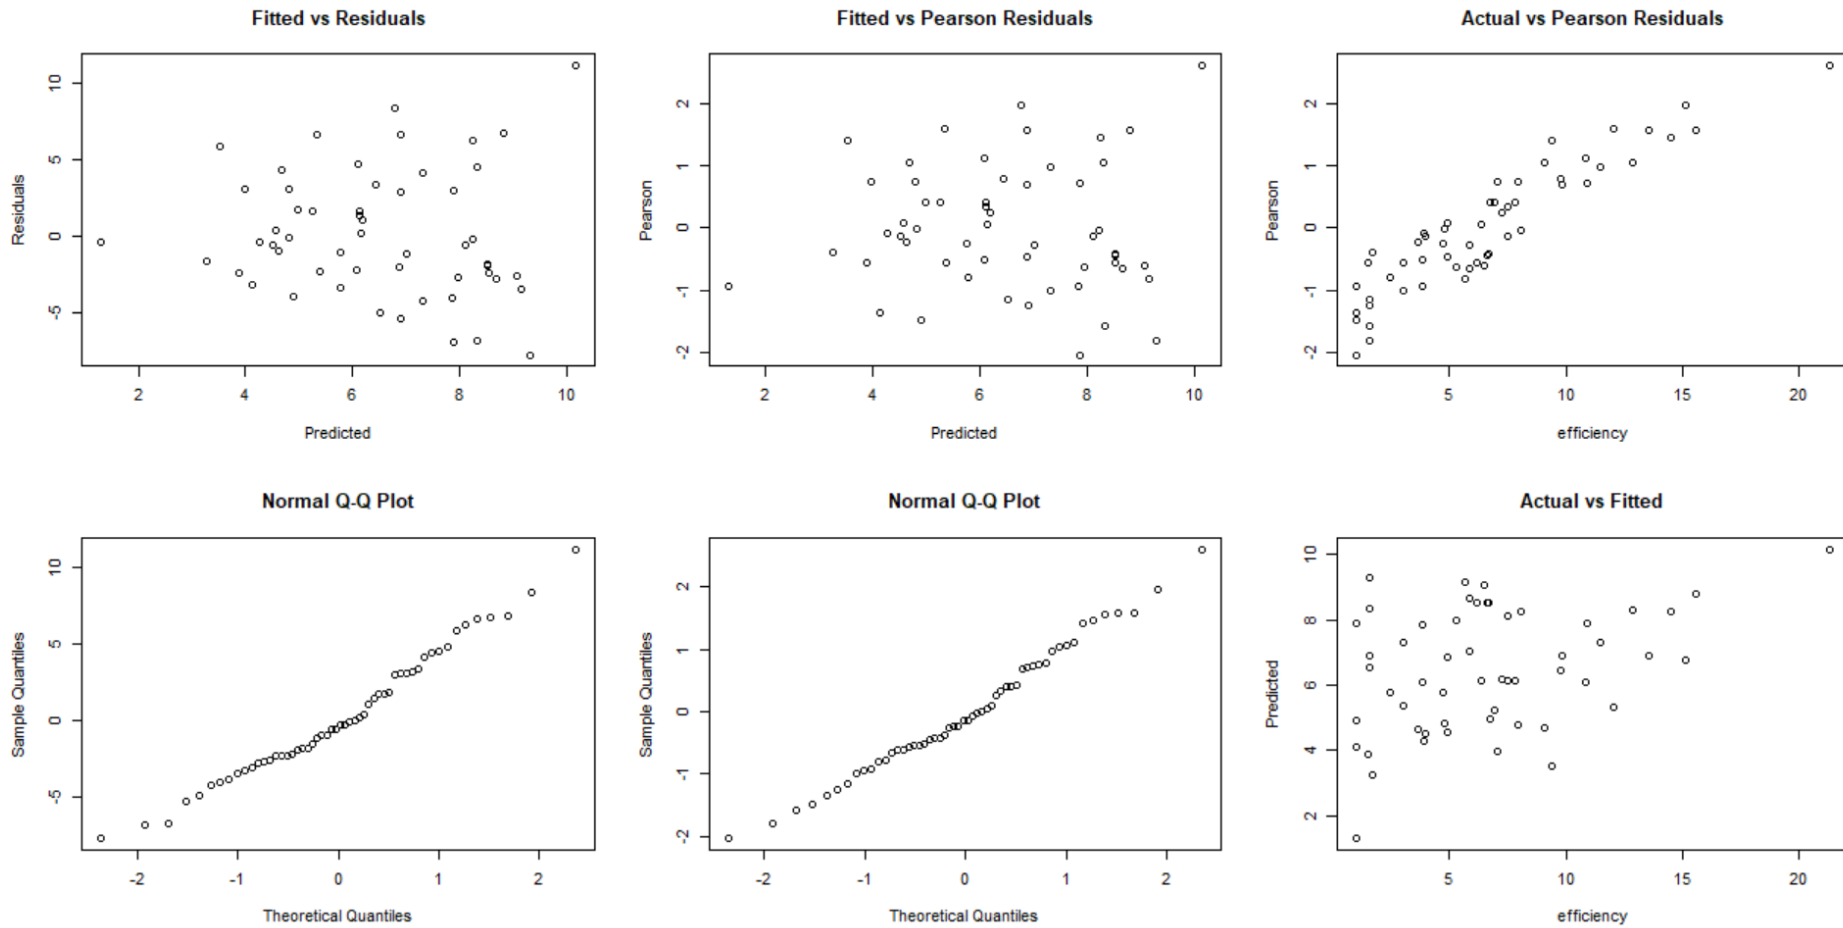

**Figure S3.** Basic residual plots for checking the Tobit Regression model fit – PQI 14.

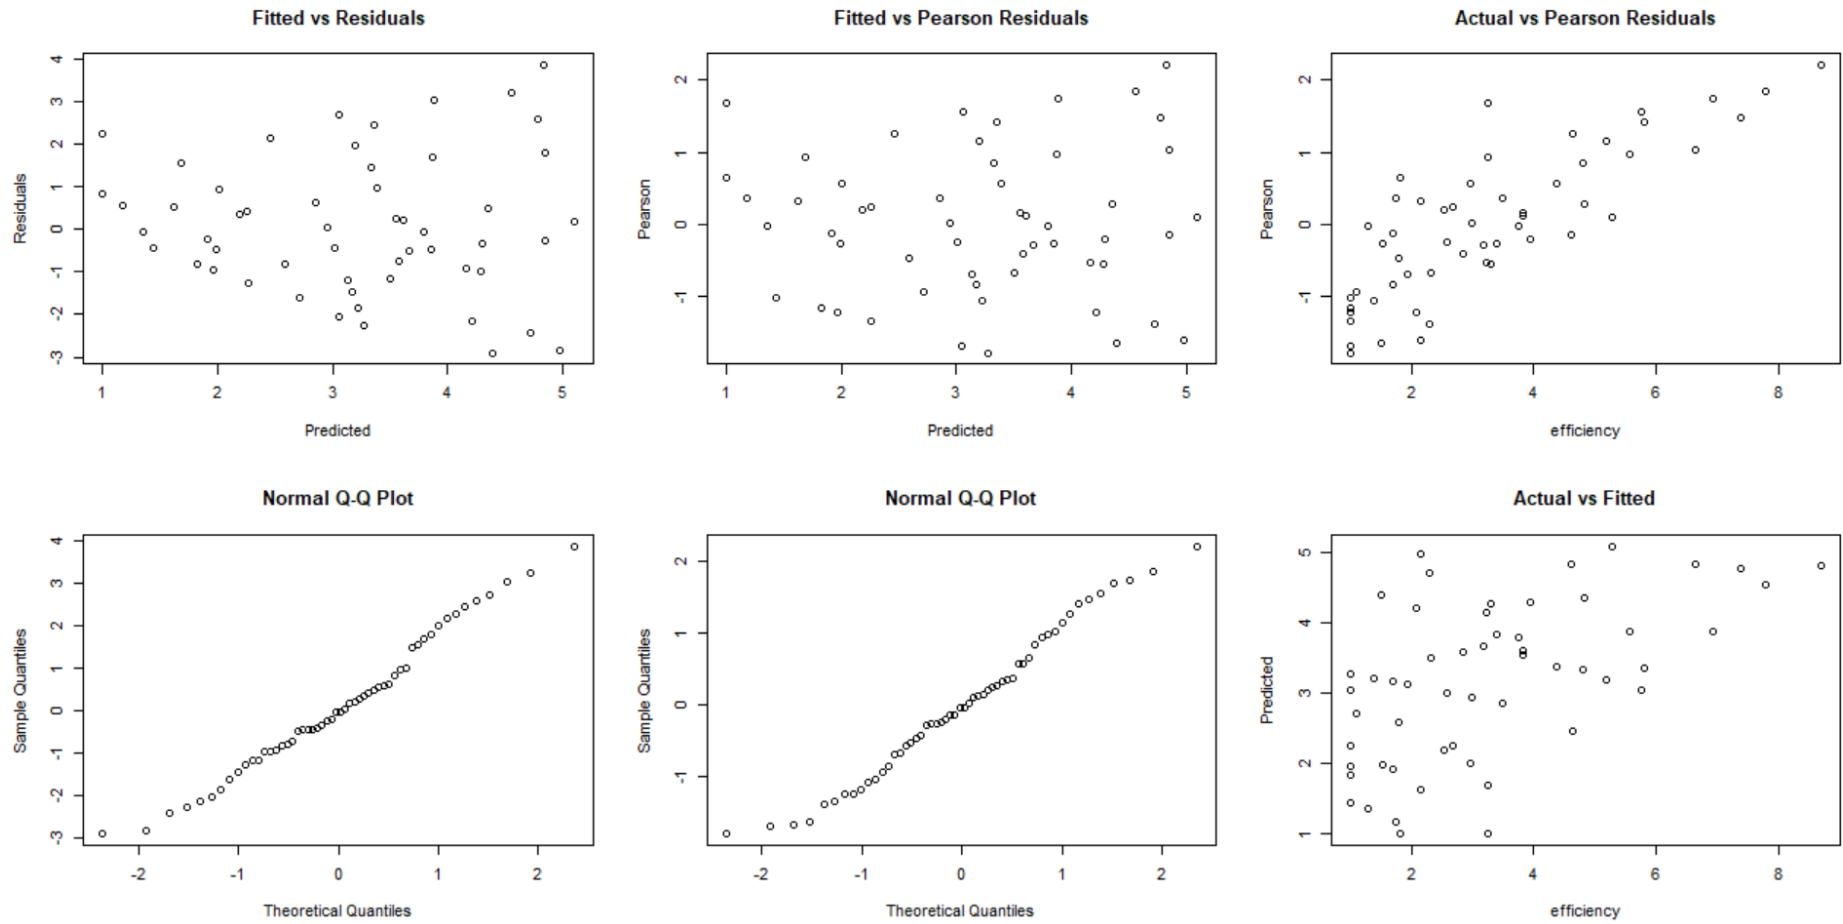

**Figure S4.** Basic residual plots for checking the Tobit Regression model fit – PQI 16.

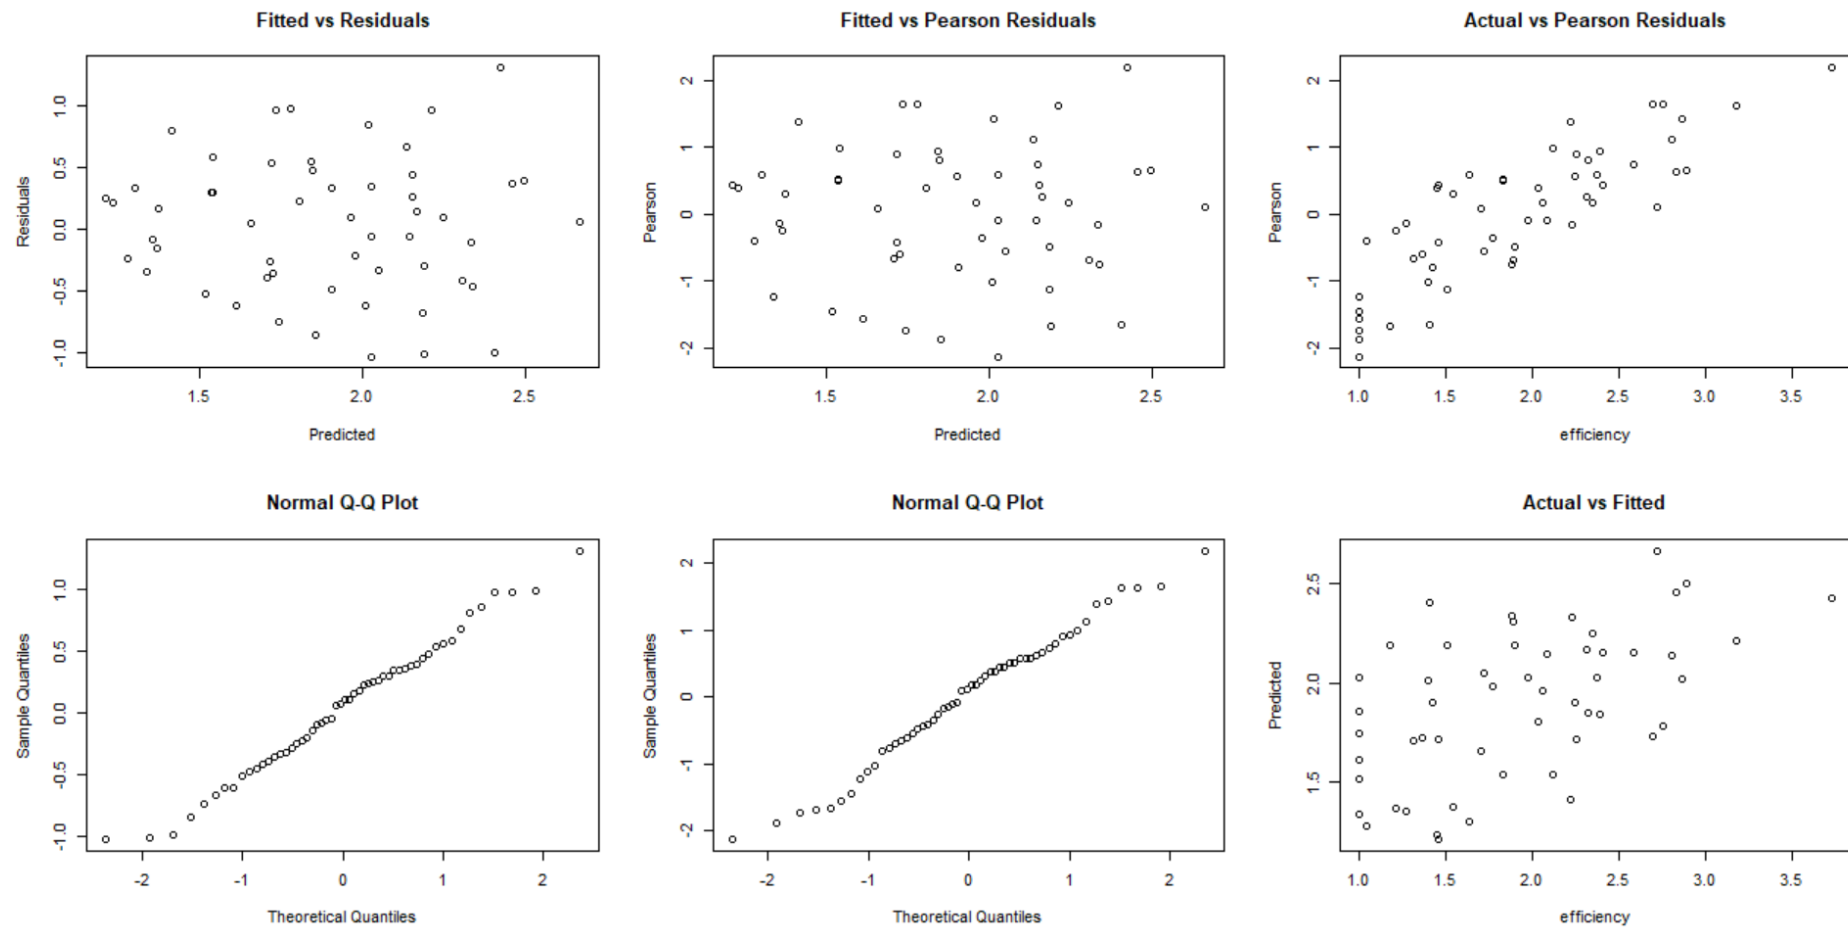

**Figure S5.** Basic residual plots for checking the Tobit Regression model fit – PQI 93.
